# Supplementary material for: Adherence to Anti-Malarial Treatment in Malaria Endemic Areas of Bangladesh
Source: MDPI journal article supplement (doi:10.3390/pathogens12121392), 2023-11-27
Supplement: s1 [file s1]

## Supplementary Table

**Table S1.** Level of adherence among the participants (N = 110) by age, gender and demographic location.

| Adherence level              |                             |                                  |          |         |
|------------------------------|-----------------------------|----------------------------------|----------|---------|
| Treatment group              | Non-adherent (NA),<br>n (%) | Probably Adherent (PA),<br>n (%) | Total, n | p-value |
| Age 11-17 Years, n=37        |                             |                                  |          |         |
| <i>Plasmodium falciparum</i> | 1 (3.3)                     | 29 (96.7)                        | 30       | 0.02    |
| <i>Plasmodium vivax</i>      | 3 (42.9)                    | 4 (57.1)                         | 7        |         |
| Age 18 Years and more, n=73  |                             |                                  |          |         |
| <i>Plasmodium falciparum</i> | 2 (4.3)                     | 45 (95.7)                        | 47       | 0.61    |
| <i>Plasmodium vivax</i>      | 2 (7.7)                     | 24 (92.3)                        | 26       |         |
| Male, n=84                   |                             |                                  |          |         |
| <i>Plasmodium falciparum</i> | 3 (5.4)                     | 53 (94.6)                        | 56       | 0.40    |
| <i>Plasmodium vivax</i>      | 3 (10.7)                    | 25 (89.3)                        | 28       |         |
| Female, n=26                 |                             |                                  |          |         |
| <i>Plasmodium falciparum</i> | 0 (0.0)                     | 21 (100.0)                       | 21       | 0.03    |
| <i>Plasmodium vivax</i>      | 2 (40.0)                    | 3 (60.0)                         | 5        |         |
| CHT area, n=99               |                             |                                  |          |         |
| <i>Plasmodium falciparum</i> | 3 (4.2)                     | 68 (95.8)                        | 71       | 0.04    |
| <i>Plasmodium vivax</i>      | 5 (17.9)                    | 23 (82.1)                        | 28       |         |
